# Supplementary material for: Metatranscriptomic Analysis of Multiple Environmental Stresses Identifies RAP2.4 Gene Associated with Arabidopsis Immunity to Botrytis cinerea
Source: PubMed Central journal article supplement (PMC6861241; doi:10.1038/s41598-019-53694-1), 2019-11-18
Supplement: 41598_2019_53694_MOESM1_ESM.pdf [file 41598_2019_53694_MOESM1_ESM.pdf]

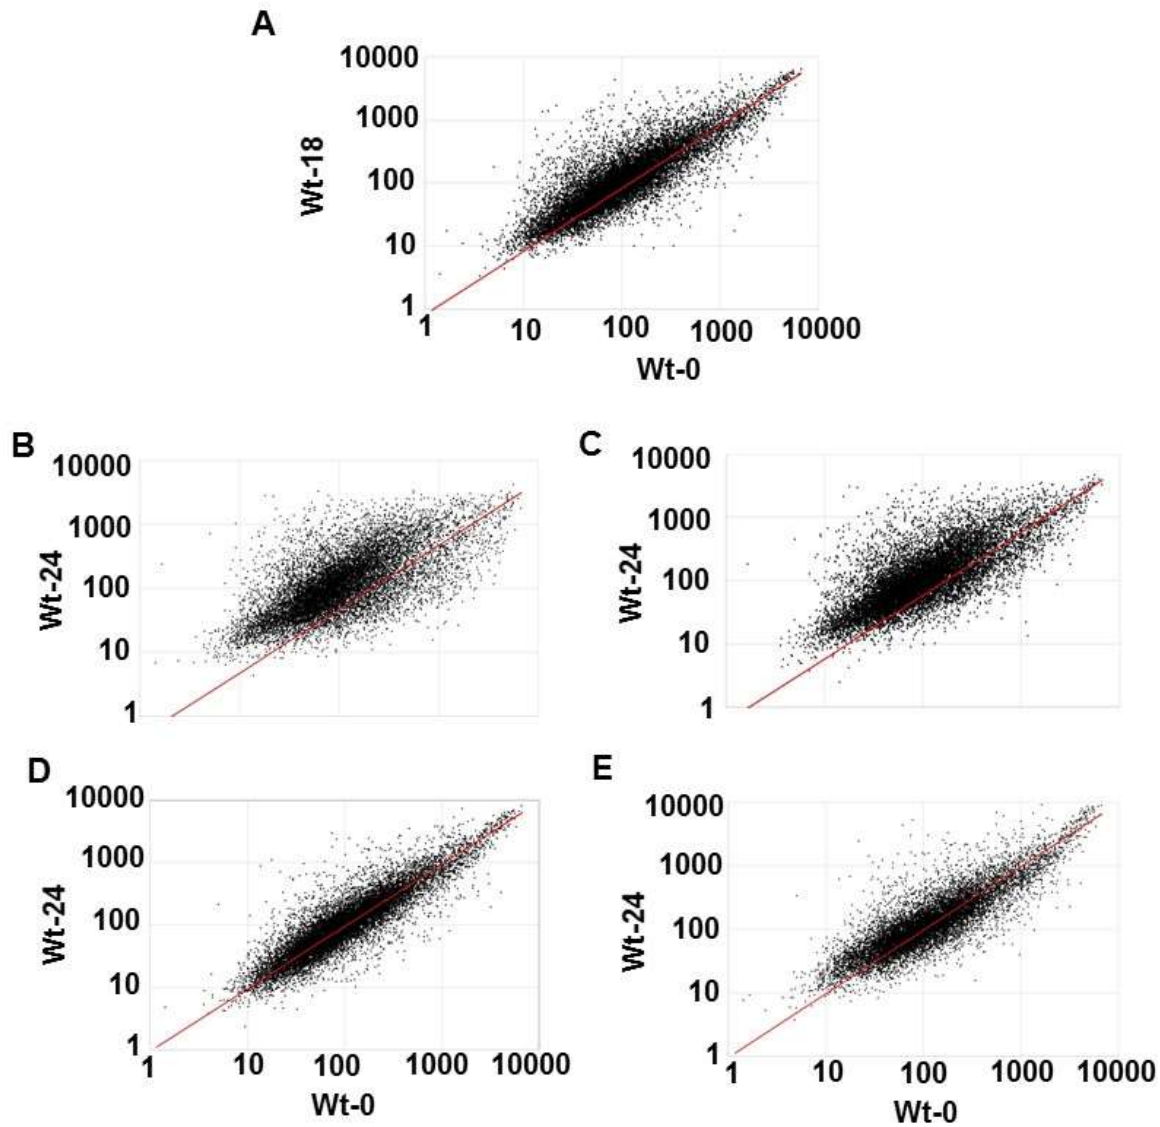

**Supplementary Figure S1. Scatter-plot comparison of gene expression of *Arabidopsis* genes treated with different biotic stresses.** Normalized expression value for each probe set in untreated wild-type plants at 0 hpi (Wt-0) is plotted on X-axis versus the expression value in wild-type plants after treated with (A) *Botrytis cinerea* at 18 hpi (Wt-18); and (B) *Pseudomonas syringae* pv *tomato* DC3000, (C) *Pseudomonas syringae* pv *tomato* avrRpm1, (D) *Alternaria brassicicola* and (E) *Perisporium rapae*. At 24 hpi (Wt-24). hpi, hours post inoculation.
