# Supplementary material for: Metatranscriptomic Analysis of Multiple Environmental Stresses Identifies RAP2.4 Gene Associated with Arabidopsis Immunity to Botrytis cinerea
Source: PubMed Central journal article supplement (PMC6861241; doi:10.1038/s41598-019-53694-1), 2019-11-18
Supplement: 41598_2019_53694_MOESM2_ESM.pdf [file 41598_2019_53694_MOESM2_ESM.pdf]

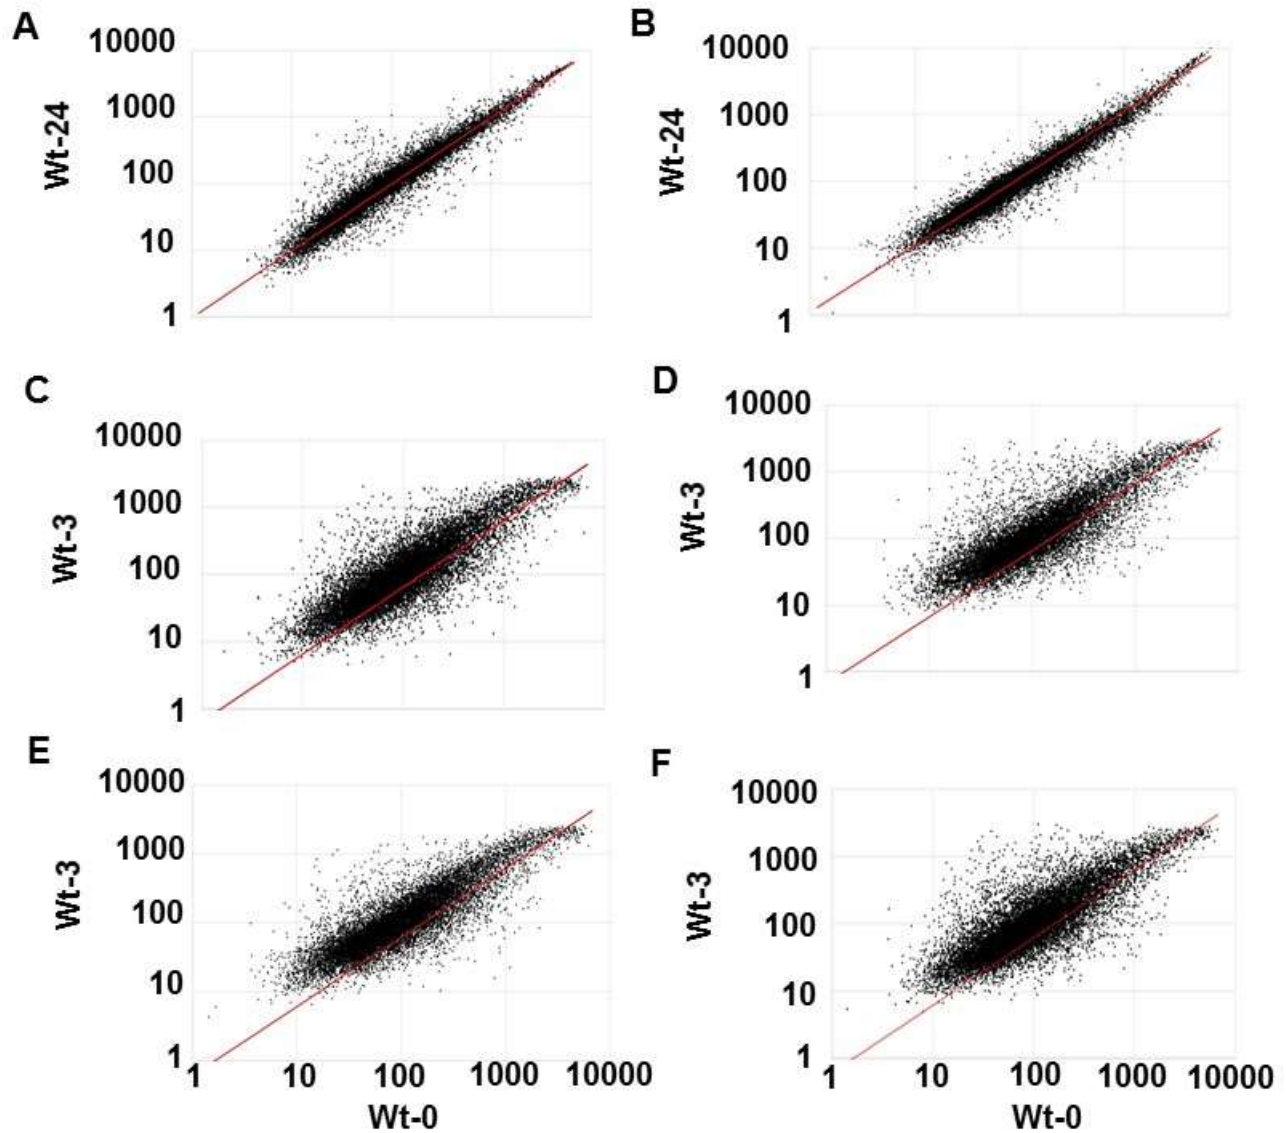

**Supplementary Figure S2.** Scatter-plot comparison of gene expression of *Arabidopsis* genes treated with abiotic and hormonal stresses. Normalized expression value for each probe set in untreated wild-type plants at 0 hpt (Wt-0) is plotted on X-axis versus the expression value in wild-type plants after treated with (A) oxidative stress, and (B) wounding, at 24 hpt (Wt-24); and (C) salicylic acid (SA), (D) methyl-jasmonate (MeJA), (E) 1-aminoacyclopentane-1-carboxylate (ACC), and (F) abscisic acid (ABA), at 3 hpt (Wt-3). hpt, hours post treatment.
