# Supplementary material for: Metatranscriptomic Analysis of Multiple Environmental Stresses Identifies RAP2.4 Gene Associated with Arabidopsis Immunity to Botrytis cinerea
Source: PubMed Central journal article supplement (PMC6861241; doi:10.1038/s41598-019-53694-1), 2019-11-18
Supplement: 41598_2019_53694_MOESM3_ESM.pdf [file 41598_2019_53694_MOESM3_ESM.pdf]

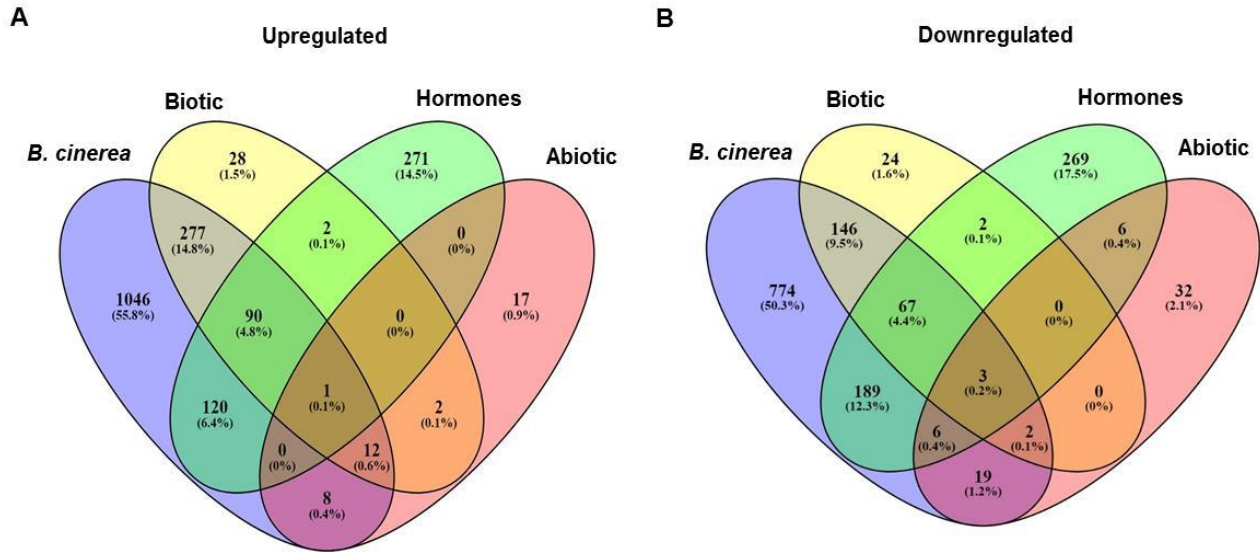

**Supplementary Figure S3. Comparison of the number of *BUGs* and *BDGs* in response to stress groups.** The Venn diagram showing the number of **(A)** *BUGs*; and **(B)** *BDGs* that were also affected by biotic, abiotic and hormonal stress groups. *BUGs*, *B. cinerea* up-regulated genes; *BDGs*, *B. cinerea* down-regulated genes.
