# Supplementary material for: Metatranscriptomic Analysis of Multiple Environmental Stresses Identifies RAP2.4 Gene Associated with Arabidopsis Immunity to Botrytis cinerea
Source: PubMed Central journal article supplement (PMC6861241; doi:10.1038/s41598-019-53694-1), 2019-11-18
Supplement: 41598_2019_53694_MOESM4_ESM.pdf [file 41598_2019_53694_MOESM4_ESM.pdf]

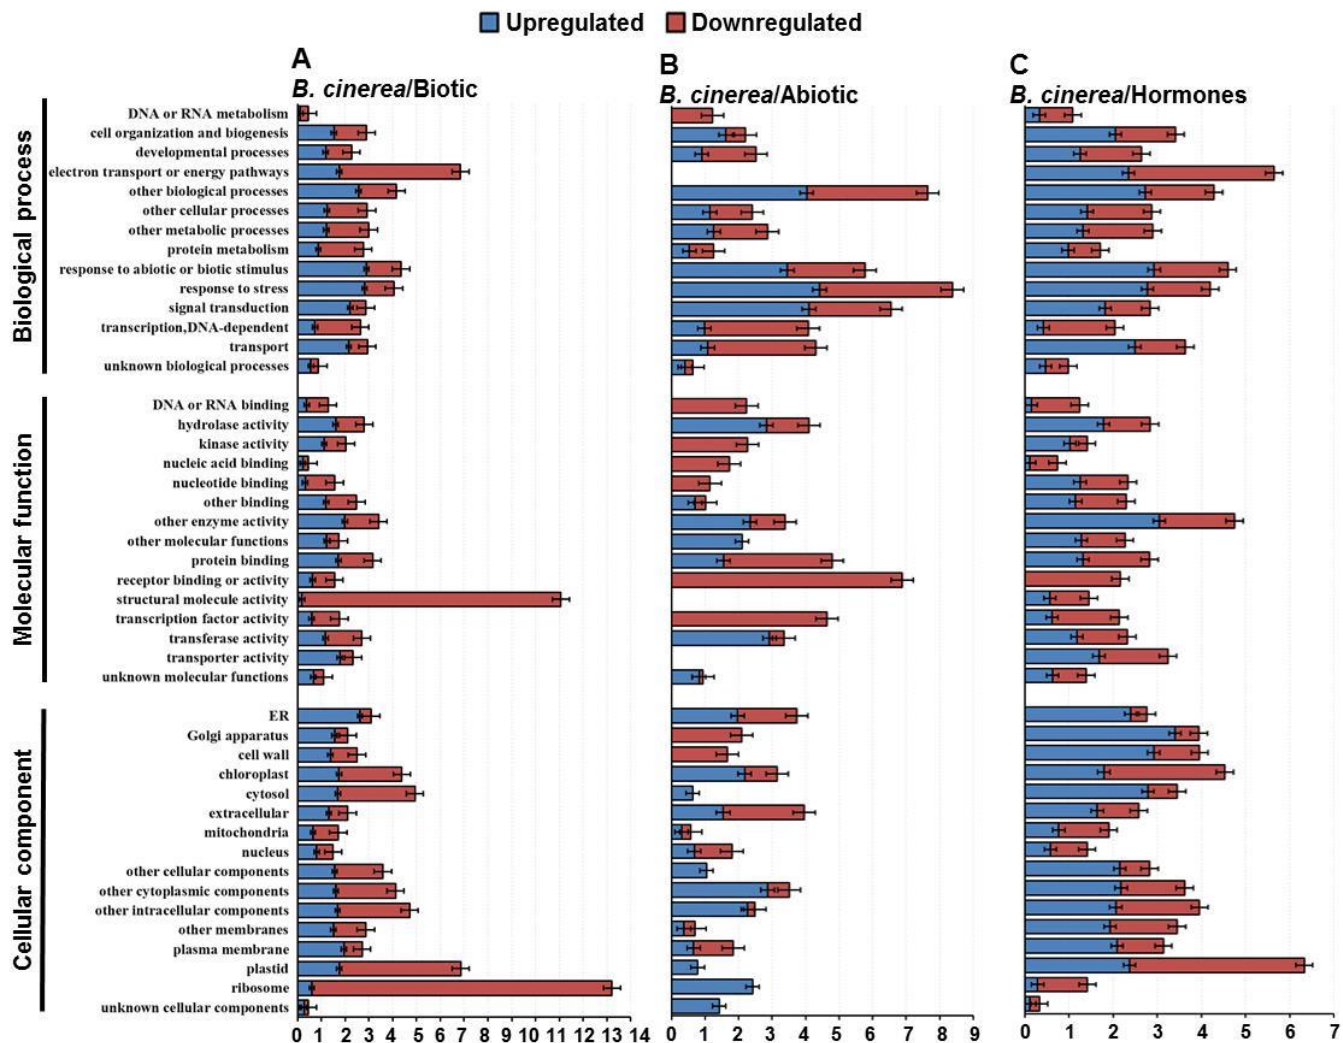

**Supplementary Figure S4. GO classification of common DEGs in response to *B. cinerea* and other stress groups.** GO of *BUGs* and *BDGs* also affected by biotic (A), abiotic (B) and hormonal (C) stresses based on biological process, molecular function and cellular components. Gene identifications of 1,554 *BUGs* and 1,206 *BDGs* entered for this analysis. Error bars are SD. GO categories significantly over- or under-represented at  $P < 0.05$  are shown. Normalized frequency of genes to the number of genes on the microarray chip was determined as previously described<sup>30</sup>.
